# Supplementary material
Source: Research Square preprint supplement (doi:10.21203/rs.3.rs-9677739/v1)

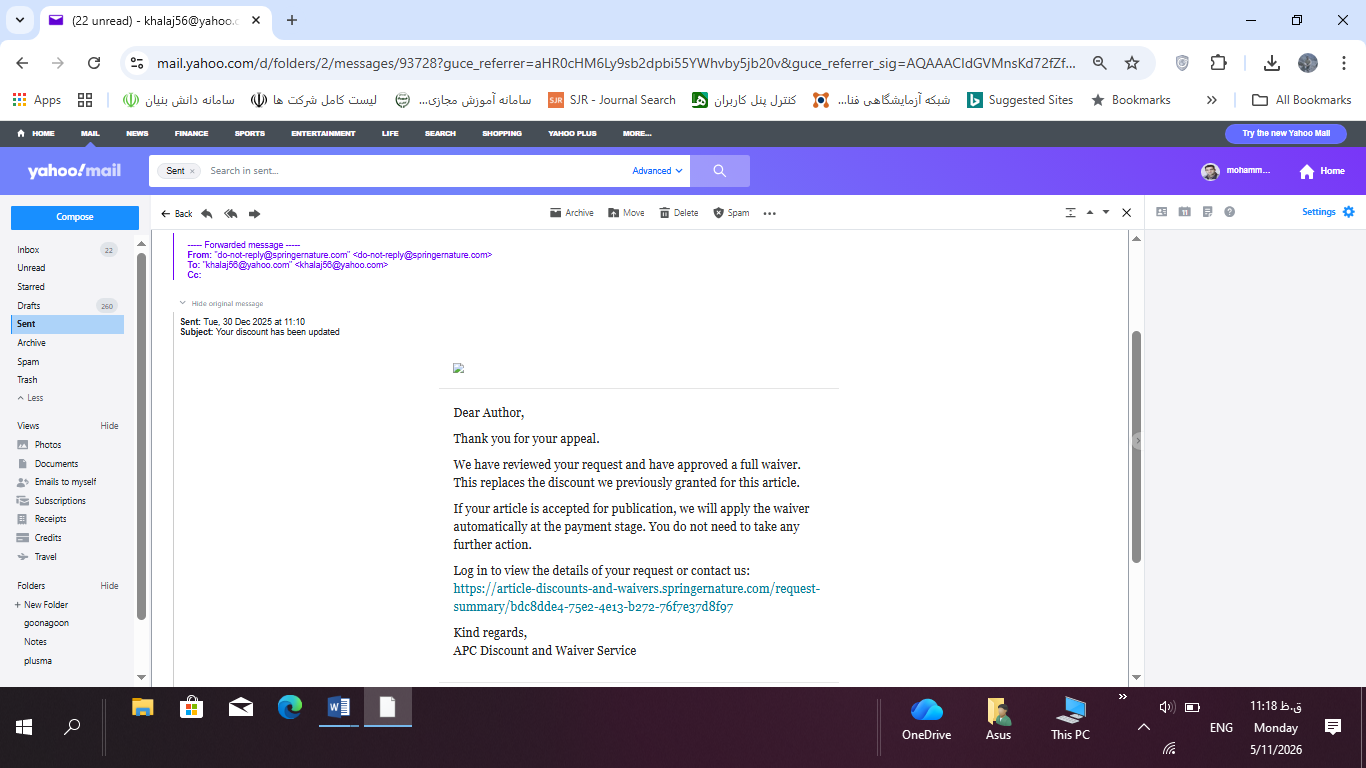

Supplement: Supplementary file 1 [file 2c7e03374fdad614677b9e5c.docx]
